# Supplementary material for: Probing the influence of substrate binding on photocatalytic dehalogenation with a heteroleptic supramolecular [M4La2Lb2] square containing PDI photosensitizers as ligands
Source: Royal Society of Chemistry journal article supplement (doi:10.1039/d2fd00179a), 2023-01-01
Supplement: d2fd00179a1.pdf [file d2fd00179a1.pdf]

Supporting information

**Probing the influence of substrate binding on photocatalytic dehalogenation with a heteroleptic supramolecular square containing PDI photosensitizers as linker**

C. Jasslie Nielsen,<sup>a</sup> Petrus C. M. Laan,<sup>a</sup> Raoul Plessius,<sup>a</sup> Joost N. H. Reek,<sup>a</sup> Jarl Ivar van der Vlugt,<sup>a,b</sup> Sonja Pullen\*<sup>a</sup>

## Characterization

### $^1\text{H-NMR}$

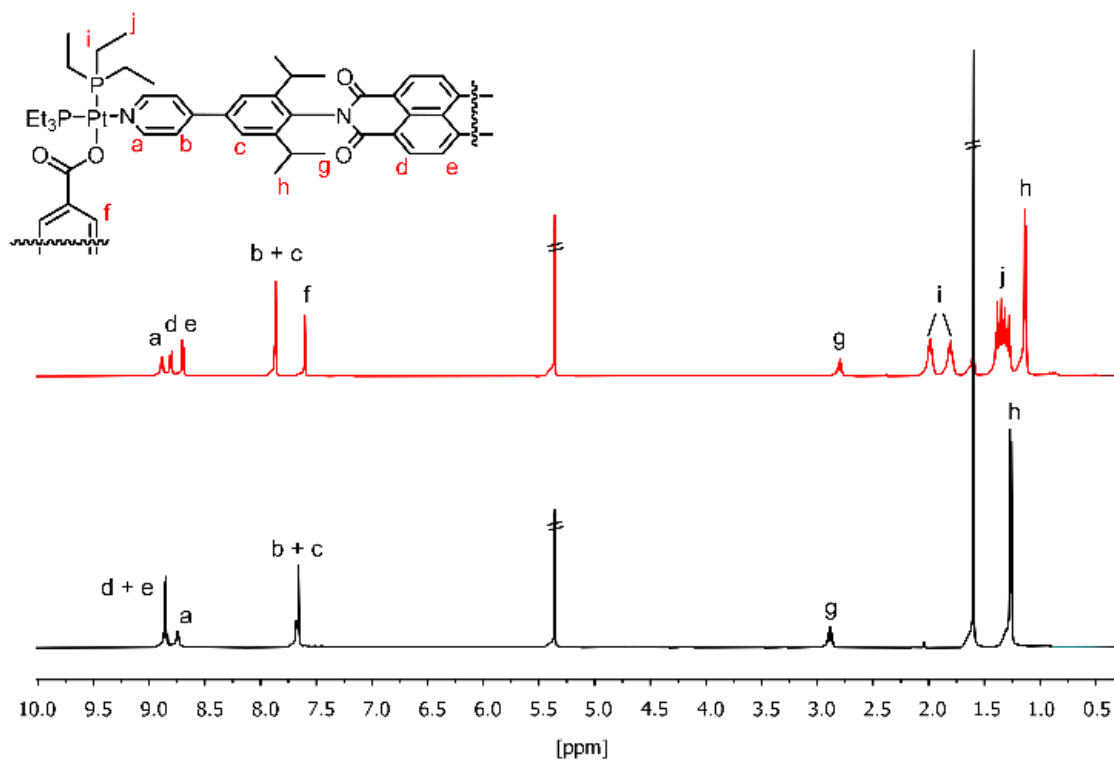

Figure S1.  $^1\text{H-NMR}$  spectrum of free **PDI-Py<sub>2</sub>** (bottom) and heteroleptic square **2** (top) in  $\text{CD}_3\text{CN}$ .

### $^{31}\text{P-NMR}$

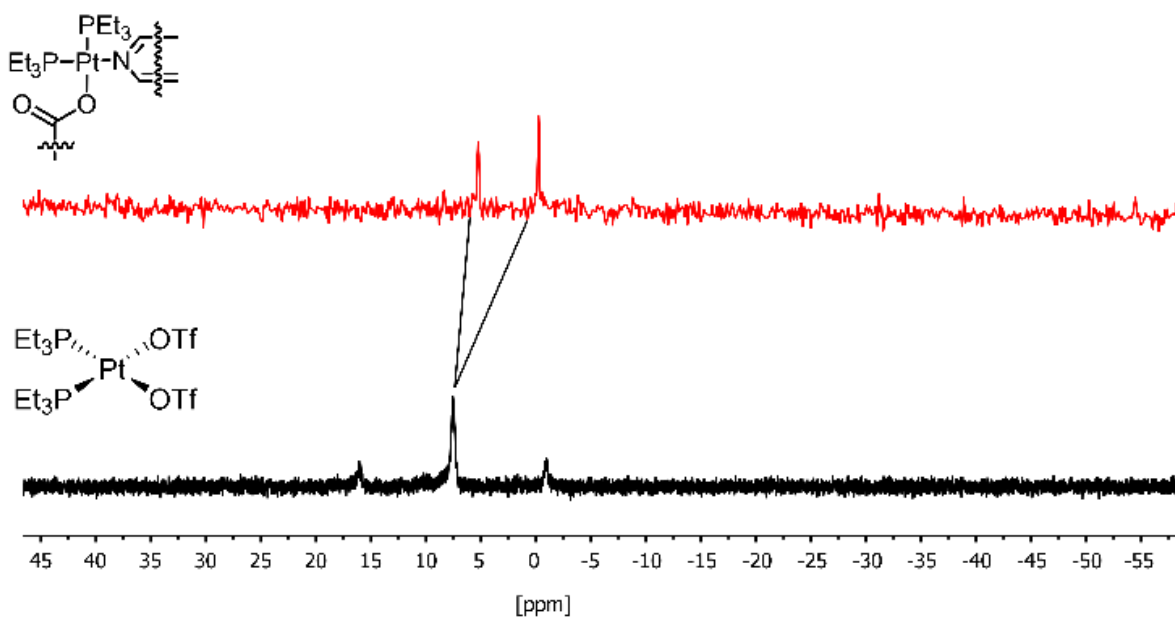

Figure S2.  $^{31}\text{P-NMR}$  showing splitting of phosphine chemical shift due to heteroleptic coordination mode in  $\text{CD}_3\text{CN}$ . Shown in black (bottom) is the  $\text{Pt(II)}$  precursor  $\text{cis-}[\text{Pt}(\text{PEt}_3)_2(\text{OTf})_2]$ .

<sup>1</sup>H-NMR DOSY

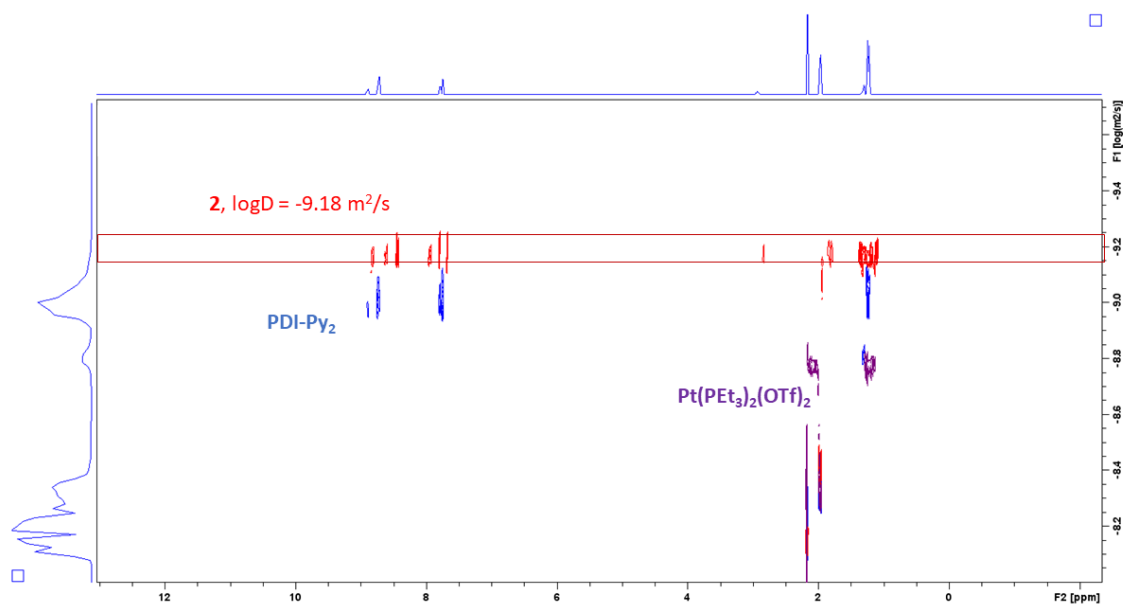

Figure S3. <sup>1</sup>H-DOSY comparing **PDI-Py<sub>2</sub>**, *cis*-[Pt(PEt<sub>3</sub>)<sub>2</sub>(OTf)<sub>2</sub>] and heteroleptic square **2** in CD<sub>3</sub>CN.

ESI-MS

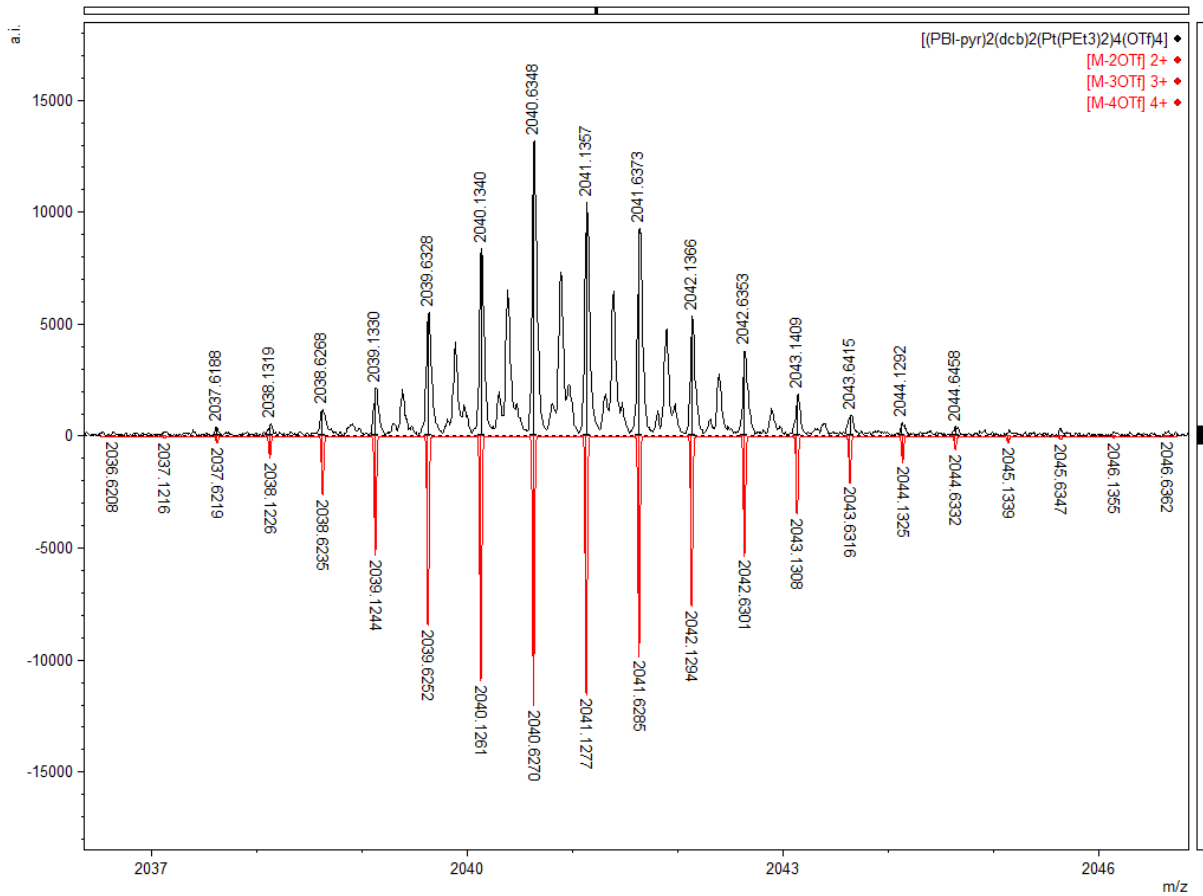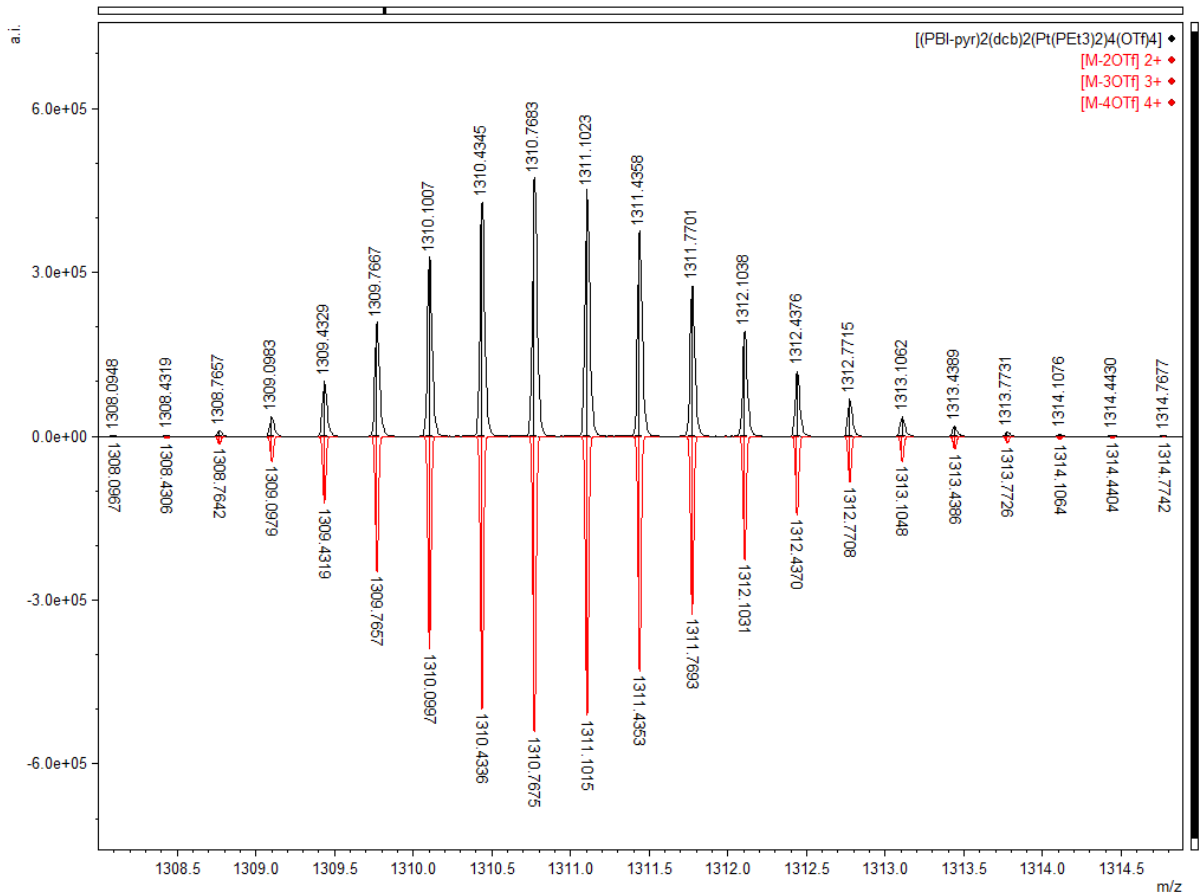

Figure S4. Sections from ESI-MS spectra of 2.

<sup>1</sup>H-NMR titrations

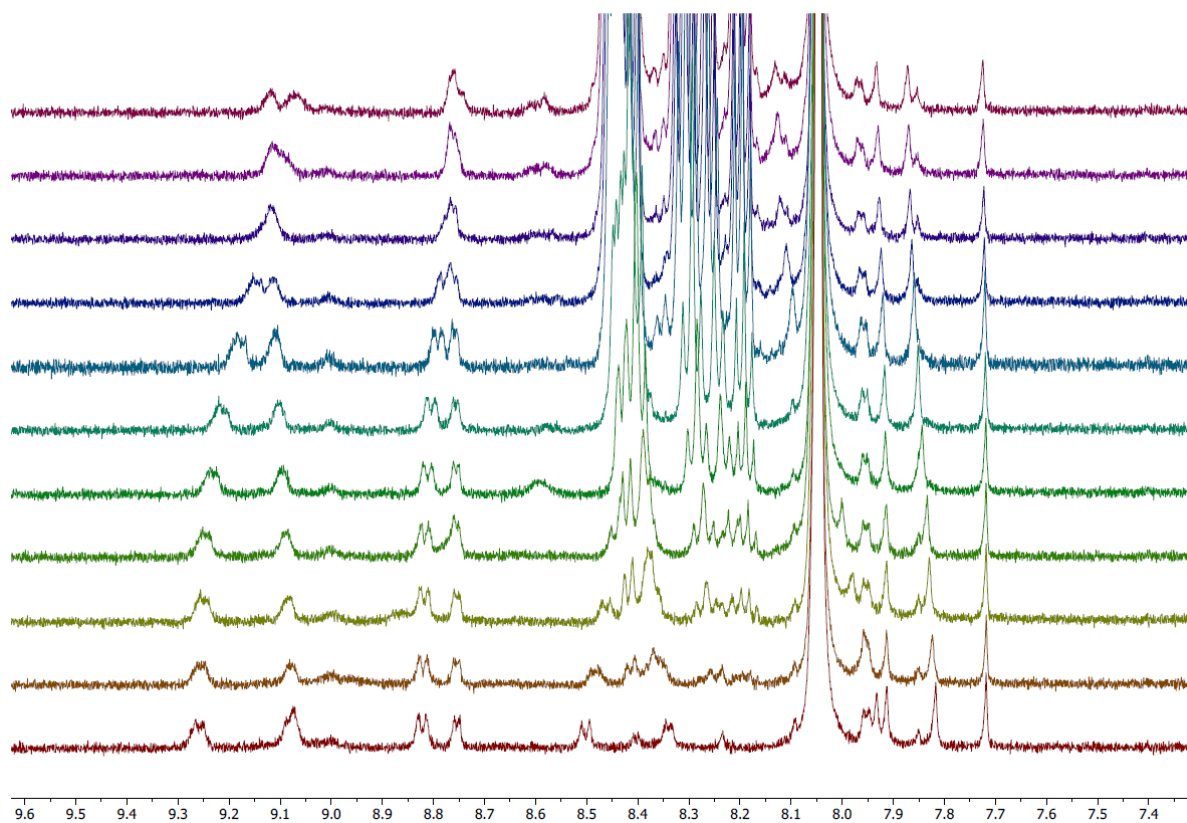

Figure S5. <sup>1</sup>H-NMR titration of 1-bromopyrene **5** to square **2** in CD<sub>3</sub>CN..

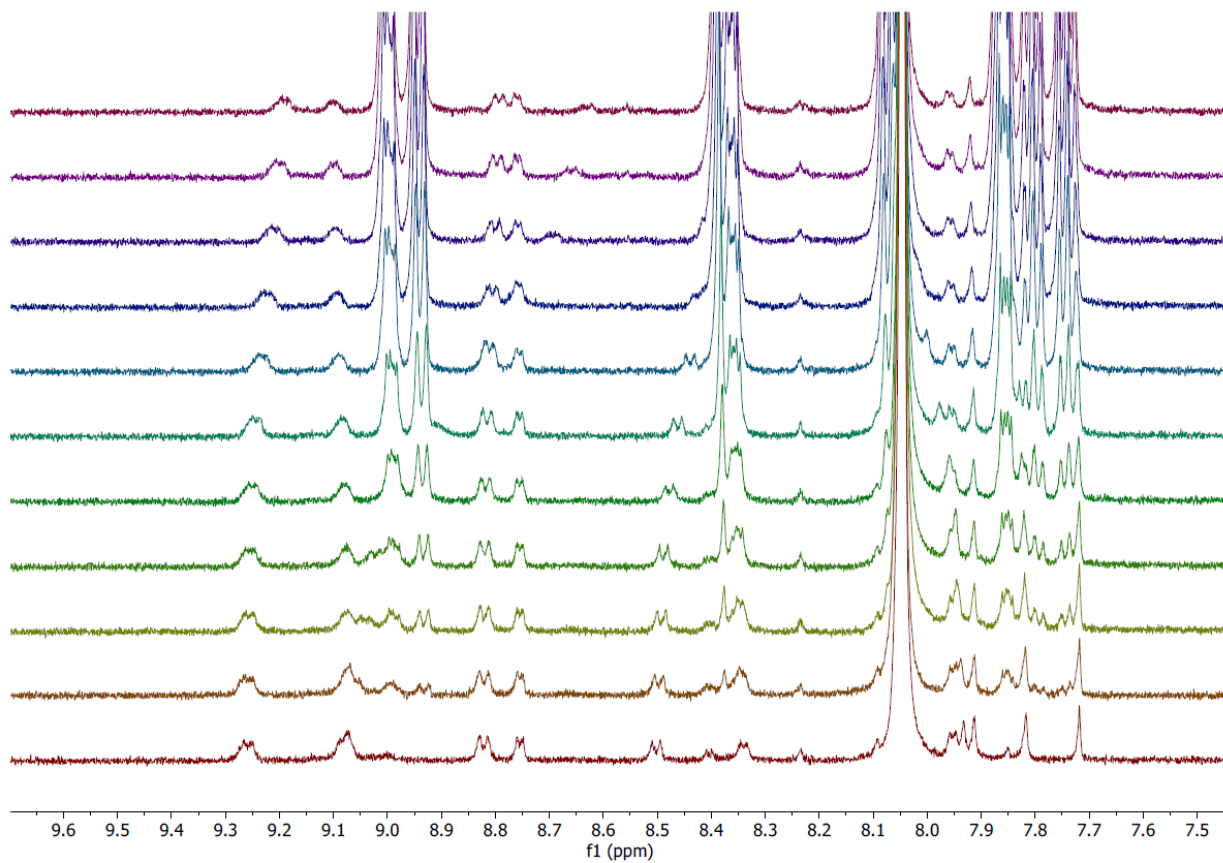

Figure S6. <sup>1</sup>H-NMR titration 9-bromophenanthrene **4** to square **2**.

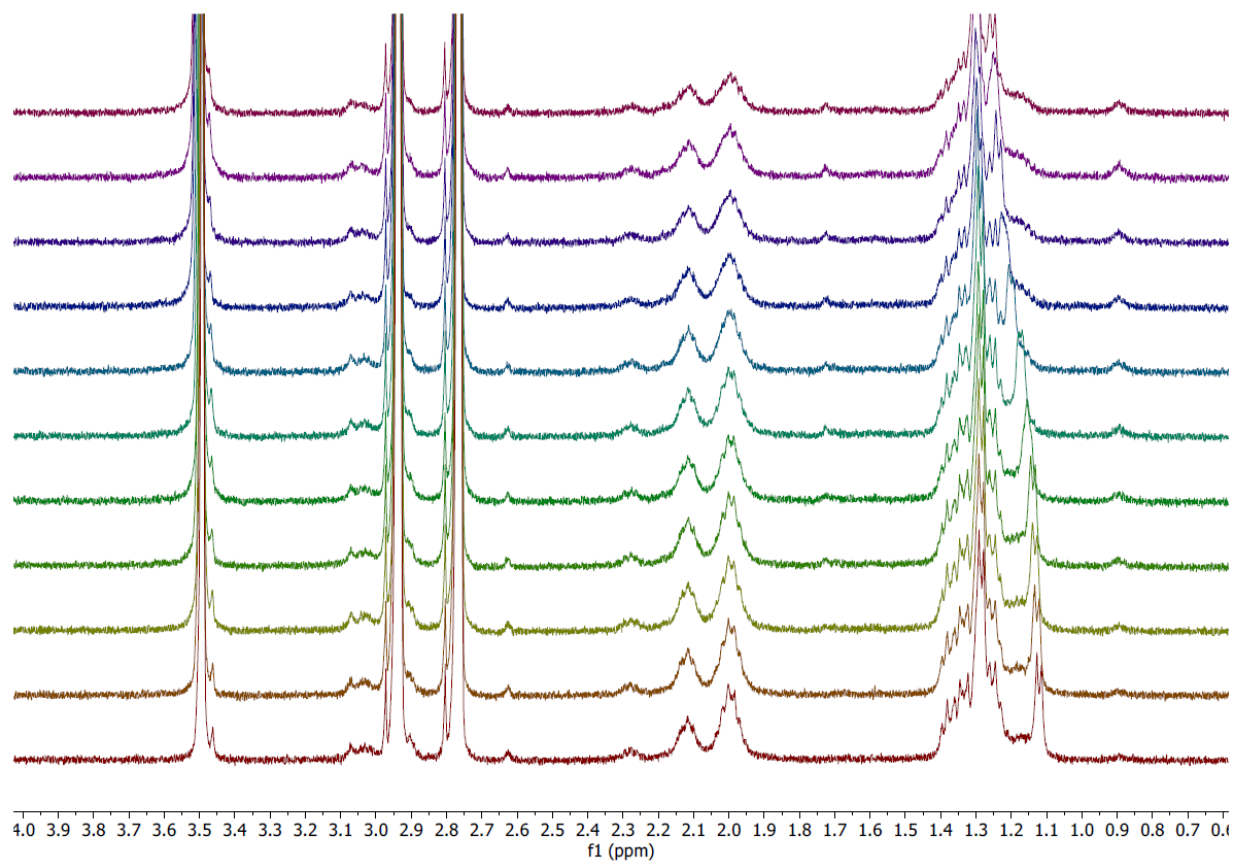

Figure S7. <sup>1</sup>H-NMR titration 9-bromophenanthrene **4** to square **2**.

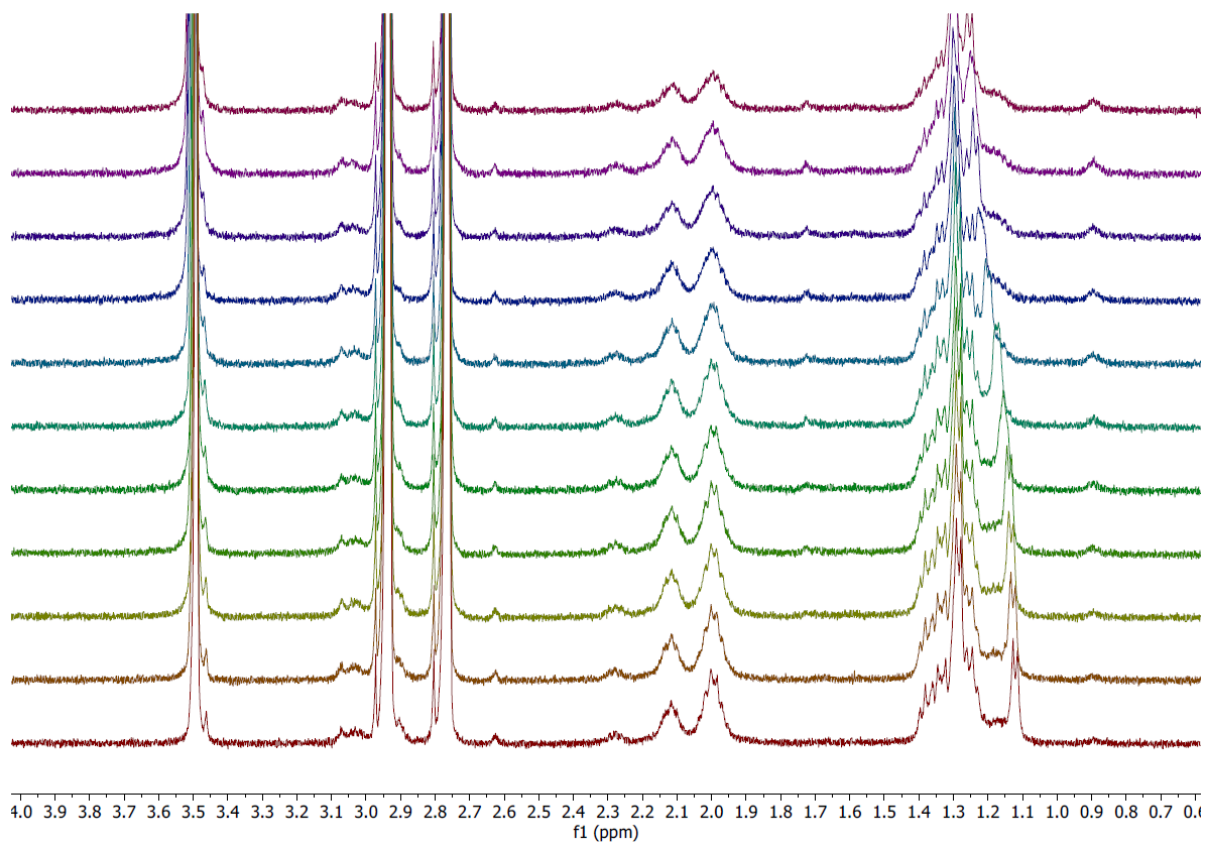

Figure S8. <sup>1</sup>H-NMR titration 4-bromo-benzaldehyde **3** to square **2**.

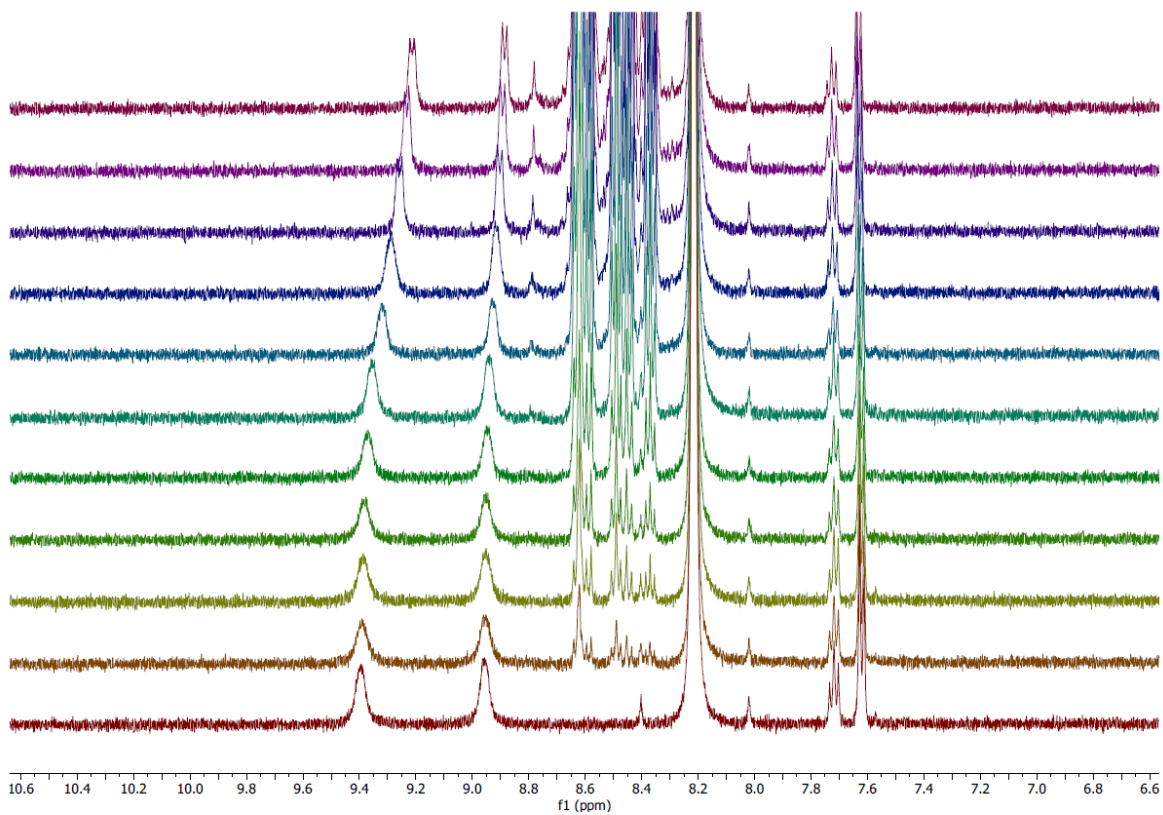

Figure S9. <sup>1</sup>H-NMR titration 1-bromopyrene **5** to free PDI **1**.

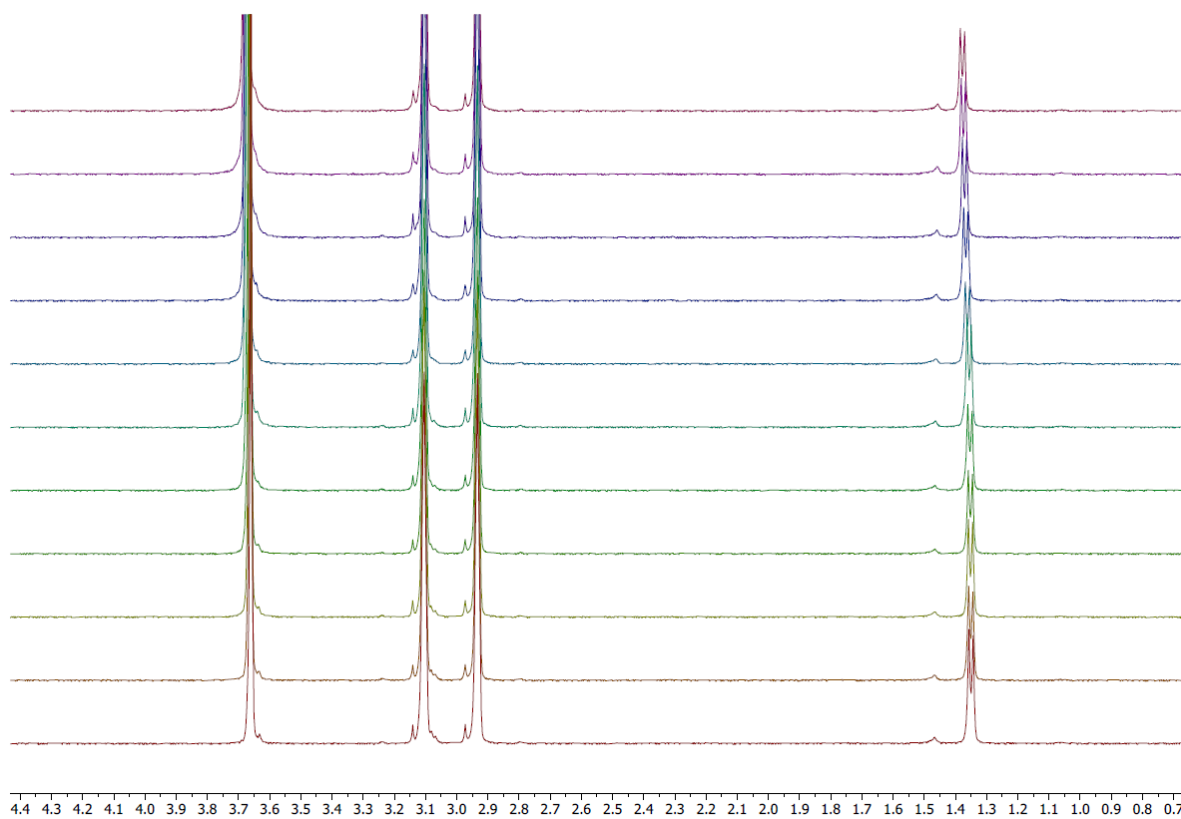

Figure S10. <sup>1</sup>H-NMR titration 1-bromopyrene **5** to free PDI **1**

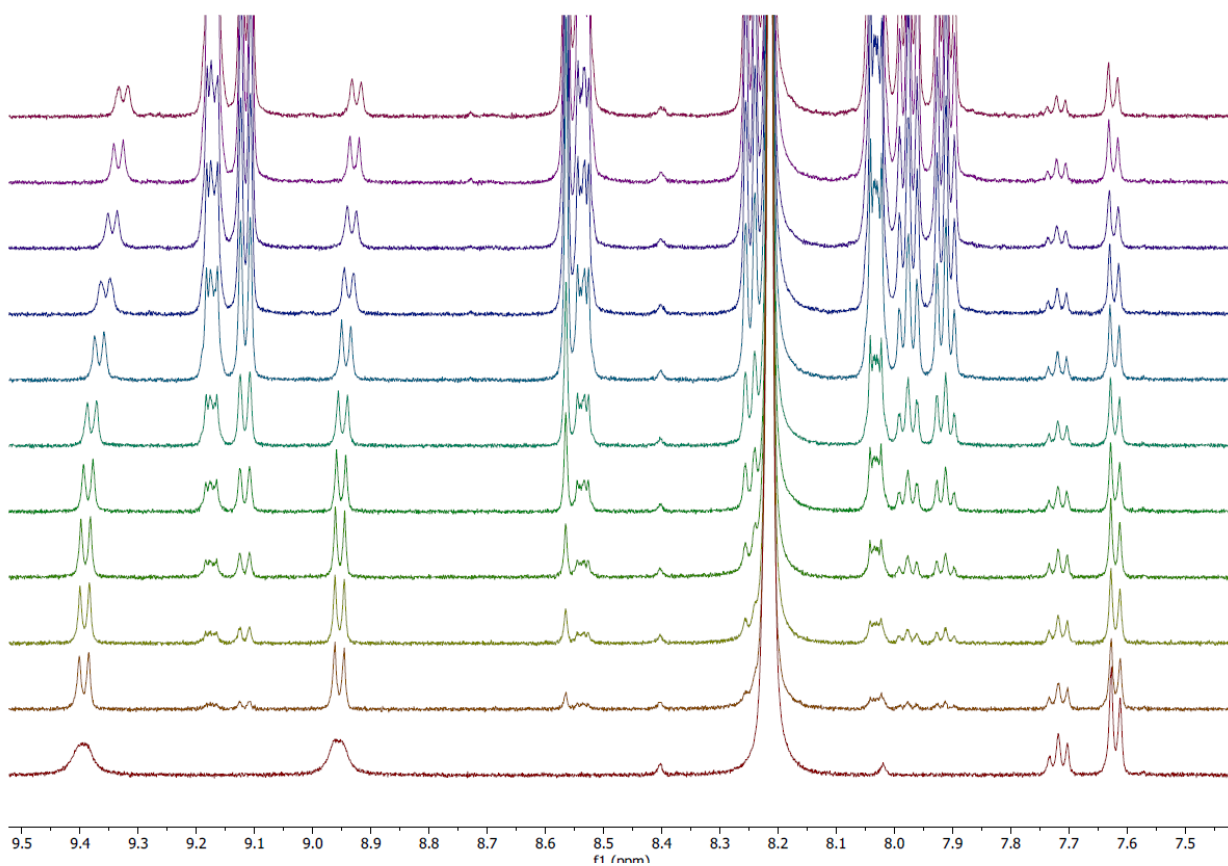

Figure S11. <sup>1</sup>H-NMR titration 9-bromophenanthrene **4** to free PDI **1**



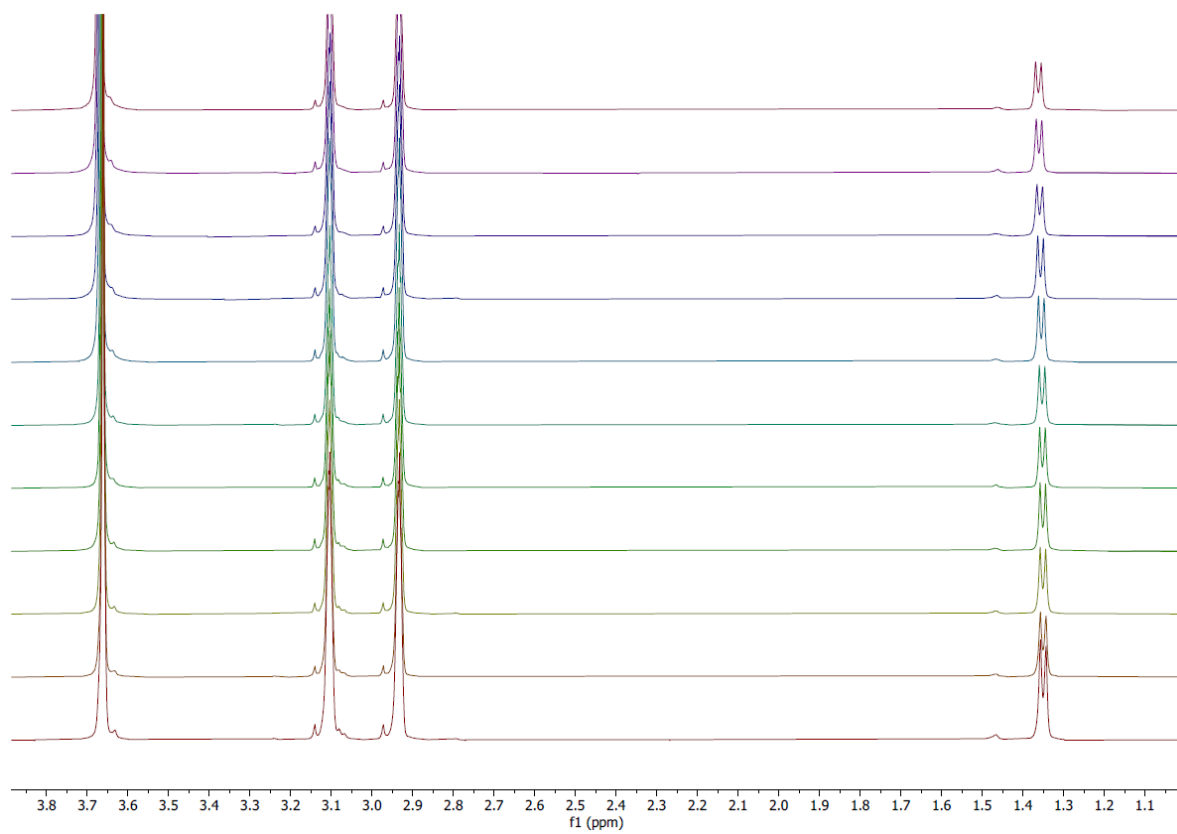

Figure S12. <sup>1</sup>H-NMR titration 9-bromophenanthrene **4** to free PDI **1**
